# Supplementary material for: Landscape variation influences trophic cascades in dengue vector food webs
Source: PubMed Central journal article supplement — Sci Adv. 2018 Feb 21;4(2):eaap9534. doi: 10.1126/sciadv.aap9534 (PMC5833996; doi:10.1126/sciadv.aap9534), 2018-02-21
Supplement: aap9534_SM.pdf [file aap9534_SM.pdf]

## Supplementary Materials for **Landscape variation influences trophic cascades in dengue vector food webs**

Robbie Weterings, Chanin Umponstira, Hannah L. Buckley

Published 21 February 2018, *Sci. Adv.* **4**, eaap9534 (2018)

DOI: 10.1126/sciadv.aap9534

### **This PDF file includes:**

- table S1. Theoretical framework used to develop the hypothetical a priori models.
- table S2. Parameter estimates (Est.) for all direct and indirect effects in the terrestrial structural equation model.
- table S3. Parameter estimates (Est.) for all direct and indirect effects in the aquatic structural equation model.
- References (43–75)

**table S1. Theoretical framework used to develop the hypothetical a priori models.** This theory is based on our experimental work and data from the literature.

| Species group        | Species                                                                   | Species interactions                                                                                                                                                                                                                                                                       | Environment                                                                                                                                                                                                                                                                                                                                                                                                                                                                                                                         |
|----------------------|---------------------------------------------------------------------------|--------------------------------------------------------------------------------------------------------------------------------------------------------------------------------------------------------------------------------------------------------------------------------------------|-------------------------------------------------------------------------------------------------------------------------------------------------------------------------------------------------------------------------------------------------------------------------------------------------------------------------------------------------------------------------------------------------------------------------------------------------------------------------------------------------------------------------------------|
| Terrestrial food web |                                                                           |                                                                                                                                                                                                                                                                                            |                                                                                                                                                                                                                                                                                                                                                                                                                                                                                                                                     |
| Aedes adults         | <i>Aedes aegypti</i> ,<br><i>Aedes albopictus</i><br>and others.          |                                                                                                                                                                                                                                                                                            | Some <i>Aedes</i> species are associated with forest habitats ( <i>Ae. albopictus</i> ) while others are more associated with urban habitats ( <i>Ae. aegypti</i> )(25). <i>Aedes</i> mosquito populations are generally higher in areas with more container habitats including water-filled treeholes (43). <i>Aedes</i> populations are generally higher during the rainy season due to increased numbers of breeding habitats (2, 44). However, temperature is a stronger predictor for <i>Aedes</i> abundance in Thailand (45). |
| Arachnids            | Pholcidae,<br>Salticidae,<br>Arachnidae<br>amongst others                 | <i>Crossopriza lyoni</i> , the most common Pholcidae in Kamphaeng Phet, has a predation rate of approximately 1.1 adult mosquito per day (16). We found that the most common Salticidae in Kamphaeng Phet have predation rates of approximately 4.3 to 10.8 adult mosquitoes per day (12). | Spiders densities are often higher in structurally complex habitats such as forest (46). Spider communities can be strongly affected by climatic events, such as rain or drought (47).                                                                                                                                                                                                                                                                                                                                              |
| House geckos         | <i>Hemidactylus frenatus</i> , <i>H. platyurus</i> and <i>Gehyra</i> spp. | <i>Hemidactylus frenatus</i> has a predation rate of approximately 63 adult mosquitoes per day (15). In an observational study we found that <i>H. frenatus</i> and <i>H. platyurus</i> from Kamphaeng Phet show a slight feeding preference for mosquitoes over most other prey (13).     | <i>Hemidactylus frenatus</i> and <i>H. platyurus</i> are habitat generalists that can be found in almost any landscape within Southeast Asia (48). <i>H. frenatus</i> has been reported to reach very high densities in urban habitats (49).                                                                                                                                                                                                                                                                                        |
| Tokay                | <i>Gekko gecko</i>                                                        | <i>Gekko gecko</i> from Thailand has been reported to feed on large insects and other large prey such as lizards and rats (50–52). Small prey, such as mosquitoes and non-active prey such as spiders, have not been reported to form an important part of its diet.                       | <i>Gekko gecko</i> is an arboreal species (53) that is sometimes found in urban areas as well (50). Its reproductive cycle is seasonal and may relate to certain climatic events (54).                                                                                                                                                                                                                                                                                                                                              |
| Cats                 | <i>Felis catus</i>                                                        | Domesticated cats are known to reduce lizard populations including <i>Hemidactylus</i> species (55–57).                                                                                                                                                                                    | Domesticated cats are likely to be more common in agricultural and urban landscapes where household density is high in comparison to forest landscapes.                                                                                                                                                                                                                                                                                                                                                                             |

| Aquatic food web           |                                                                                                                                 |                                                                                                                                                                                                                                                                                                                                                              |                                                                                                                                                                                                                                                                                                                                                                                                                                                                                                 |
|----------------------------|---------------------------------------------------------------------------------------------------------------------------------|--------------------------------------------------------------------------------------------------------------------------------------------------------------------------------------------------------------------------------------------------------------------------------------------------------------------------------------------------------------|-------------------------------------------------------------------------------------------------------------------------------------------------------------------------------------------------------------------------------------------------------------------------------------------------------------------------------------------------------------------------------------------------------------------------------------------------------------------------------------------------|
| <i>Aedes</i> larvae        | <i>Aedes aegypti</i> , <i>Ae. albopictus</i> and others.                                                                        | -                                                                                                                                                                                                                                                                                                                                                            | <i>Aedes</i> larvae are mainly found in container-like habitats (25). They need detritus as nutrition (58) and often occur in rain-water filled habitats (25). Rain-water is typical nutrient poor, slightly acid and has a low turbidity (59).                                                                                                                                                                                                                                                 |
| Backswimmers               | <i>Notonecta</i> spp. and <i>Anisops</i> spp.                                                                                   | Many backswimmer species feed on mosquito larvae (19, 60, 61). Predation rates range between 1- 34 mosquito larvae per day. In an experimental study we have shown that the predation rates for a common species from Kamphaeng Phet ranges between 1.2 – 5.9 larvae per day (19).                                                                           | Backswimmers are found in many different kinds of habitats (60). In Kamphaeng Phet they are more often found in container habitats in forest landscapes (11). Habitat isolation has a profound effect on its presence (11). Hence, container density may increase its occurrence. Habitat complexity (e.g. aquatic plants) may affect its feeding behaviour but also provides refuge (62). Backswimmers hunt by vision and water quality can therefore severely affect their feeding rate (63). |
| Anura                      | <i>Kaloula pulchra</i> , <i>Polypedates leucomystax</i> , <i>Bufo melanostictus</i> and <i>Hylarana raniceps</i> amongst others | We have shown that most local tadpoles do not feed on mosquito larvae (17). However, they are important egg predators (64) and strong competitors of mosquito larvae (65).                                                                                                                                                                                   | Several Anura species from Southeast Asia are often found in urban areas while others are more arboreal (66). The reproductive cycle of Anura is climate dependent (66). Anura are very sensitive to pollution, hence water quality is important (67).                                                                                                                                                                                                                                          |
| Micro-heteroptera          | Corixidae, Pleidae and Veliidae                                                                                                 | Previously we have shown that allometry is an important factor in context of predation rates for local Heteroptera (18). Hence, small heteroptera are expected to have lower predation rates in comparison to Notonecta, for example. Although small in size, Corixidae, Pleidae and Veliidae can have a strong effect on mosquito larval abundance (68–70). | Corixidae, Pleidae and Veliidae occur often in small container-like habitats (68). They are common in many different aquatic habitats in various landscapes types including forest, urban and agricultural landscapes (71, 72).                                                                                                                                                                                                                                                                 |
| <i>Toxorhynchites</i> spp. | <i>Toxorhynchites splendens</i>                                                                                                 | <i>Toxorhynchites splendens</i> is a common local species that has a predation rate of 19.2 or higher (11). It is specialised in feeding on mosquito larvae (73). In addition, we found that <i>Toxorhynchites splendens</i> reduces <i>Aedes</i> larvae in greater numbers than <i>Culex</i> larvae when occurring in the same aquatic habitat (11).        | <i>Toxorhynchites</i> spp. are arboreal and are often found in water-filled treeholes (74). Habitat isolation has a strong effect on its occurrence (11). Hence, container density may increase its occurrence. It is highly dependent on climatic conditions for its food and reproductive cycle (75).                                                                                                                                                                                         |

**table S2. Parameter estimates (Est.) for all direct and indirect effects in the terrestrial structural equation model.** SE is the standard error and Std. Est. is the standardized parameter estimate.

| Effects                                                      | Alternative model |       |         |           |
|--------------------------------------------------------------|-------------------|-------|---------|-----------|
|                                                              | Est.              | SE    | P-value | Std. Est. |
| <b>Latent variables</b>                                      |                   |       |         |           |
| <i>Seasonality</i>                                           |                   |       |         |           |
| Precipitation                                                | -0.580            | 0.178 | 0.001   | -0.584    |
| Temperature                                                  | 0.904             | 0.279 | 0.001   | 0.911     |
| <i>Landscape</i>                                             |                   |       |         |           |
| Forest                                                       | -0.998            | 0.102 | < 0.001 | -0.997    |
| Agriculture                                                  | 0.735             | 0.103 | < 0.001 | 0.741     |
| Water                                                        | 0.081             | 0.091 | 0.373   | 0.082     |
| <b>Regressions</b>                                           |                   |       |         |           |
| <i>Aedes mosquitoes</i>                                      |                   |       |         |           |
| House geckos → <i>Aedes</i>                                  | -2.123            | 1.086 | 0.050   | -0.261    |
| House geckos → Spiders → <i>Aedes</i>                        | 0.707             | 0.519 | 0.173   | -0.087    |
| Total                                                        | -1.415            | 1.136 | 0.213   | 0.174     |
| Spiders → <i>Aedes</i>                                       | -1.042            | 0.508 | 0.040   | -0.262    |
| Seasonality → <i>Aedes</i>                                   | -0.214            | 0.136 | 0.115   | -0.287    |
| Seasonality → Spiders → <i>Aedes</i>                         | 0.063             | 0.044 | 0.153   | 0.085     |
| Seasonality → House geckos → <i>Aedes</i>                    | -0.003            | 0.027 | 0.900   | -0.004    |
| Seasonality → House geckos → Spiders → <i>Aedes</i>          | 0.000             | 0.001 | 0.896   | 0.001     |
| Seasonality → Tokays → House geckos → <i>Aedes</i>           | 0.007             | 0.010 | 0.485   | 0.009     |
| Seasonality → Tokays → House geckos → Spiders → <i>Aedes</i> | -0.002            | 0.004 | 0.581   | -0.003    |
| Seasonality → Containers → <i>Aedes</i>                      | -0.059            | 0.041 | 0.152   | -0.079    |
| Total indirect effects                                       | 0.005             | 0.053 | 0.923   | 0.008     |
| Total                                                        | -0.209            | 0.116 | 0.072   | -0.279    |
| Landscape → <i>Aedes</i>                                     | 0.042             | 0.078 | 0.586   | 0.057     |
| Landscape → Spiders → <i>Aedes</i>                           | 0.017             | 0.023 | 0.452   | 0.023     |
| Landscape → House geckos → <i>Aedes</i>                      | -0.046            | 0.045 | 0.304   | -0.062    |
| Landscape → House geckos → Spiders → <i>Aedes</i>            | 0.015             | 0.011 | 0.174   | 0.021     |
| Landscape → Tokays → House geckos → <i>Aedes</i>             | -0.047            | 0.023 | 0.044   | -0.063    |
| Landscape → Tokays → House geckos → Spiders → <i>Aedes</i>   | 0.016             | 0.015 | 0.291   | 0.021     |
| Landscape → Cats → House geckos → <i>Aedes</i>               | -0.211            | 0.159 | 0.183   | -0.026    |

|                                                          |        |       |         |        |
|----------------------------------------------------------|--------|-------|---------|--------|
| Landscape → Cats → House geckos → Spiders → <i>Aedes</i> | 0.070  | 0.058 | 0.230   | 0.009  |
| Total indirect effects                                   | -0.186 | 0.187 | 0.321   | -0.078 |
| Total                                                    | -0.143 | 0.165 | 0.384   | -0.021 |
| Containers → <i>Aedes</i>                                | 0.222  | 0.116 | 0.056   | 0.294  |
| <i>Indirect effects</i>                                  |        |       |         |        |
| Cats → House geckos → <i>Aedes</i>                       | 0.041  | 0.027 | 0.132   | 0.055  |
| Cats → House geckos → Spiders → <i>Aedes</i>             | -0.014 | 0.011 | 0.202   | -0.018 |
| Cats total indirect effects                              | 0.027  | 0.026 | 0.285   | 0.036  |
| Tokays → House geckos → <i>Aedes</i>                     | 0.898  | 0.451 | 0.046   | 0.111  |
| Tokays → House geckos → Spiders → <i>Aedes</i>           | -0.299 | 0.296 | 0.312   | -0.037 |
| Tokays total indirect effects                            | 0.599  | 0.383 | 0.118   | 0.074  |
| <i>Spiders</i>                                           |        |       |         |        |
| House geckos → Spiders                                   | -0.679 | 0.270 | 0.012   | -0.332 |
| Landscape → Spiders                                      | -0.017 | 0.020 | 0.403   | -0.088 |
| Landscape → House geckos → Spiders                       | -0.015 | 0.009 | 0.105   | -0.079 |
| Landscape → Cats → House geckos → Spiders                | 0.001  | 0.001 | 0.128   | 0.007  |
| Landscape → Tokays → House geckos → Spiders              | -0.015 | 0.010 | 0.116   | -0.080 |
| Total indirect effects                                   | -0.029 | 0.011 | 0.012   | -0.152 |
| Total                                                    | -0.045 | 0.019 | 0.017   | -0.240 |
| Seasonality → Spiders                                    | -0.061 | 0.026 | 0.018   | -0.323 |
| Seasonality → House geckos → Spiders                     | -0.001 | 0.008 | 0.899   | -0.006 |
| Seasonality → Tokays → House geckos → Spiders            | 0.002  | 0.004 | 0.541   | 0.011  |
| Total indirect effects                                   | 0.001  | 0.009 | 0.901   | 0.006  |
| Total                                                    | -0.060 | 0.024 | 0.014   | -0.317 |
| <i>Indirect effects</i>                                  |        |       |         |        |
| Cats → House geckos → Spiders                            | 0.013  | 0.006 | 0.027   | 0.069  |
| Tokays → House geckos → Spiders                          | 0.287  | 0.199 | 0.149   | 0.141  |
| <i>House geckos</i>                                      |        |       |         |        |
| Tokays → House geckos                                    | -0.423 | 0.171 | 0.014   | -0.425 |
| Landscape → House geckos                                 | 0.022  | 0.015 | 0.153   | 0.057  |
| Landscape → Tokays → House geckos                        | 0.022  | 0.008 | 0.006   | 0.241  |
| Total                                                    | 0.044  | 0.012 | < 0.001 | 0.479  |
| Seasonality → House geckos                               | 0.002  | 0.013 | 0.901   | 0.017  |

|                                     |        |       |         |        |
|-------------------------------------|--------|-------|---------|--------|
| Seasonality → Tokays → House geckos | -0.003 | 0.005 | 0.504   | -0.035 |
| Total                               | -0.002 | 0.013 | 0.899   | -0.017 |
| Cats → House geckos                 | -0.019 | 0.005 | < 0.001 | -0.209 |
| <i>Container habitats</i>           |        |       |         |        |
| Seasonality → Containers            | -0.268 | 0.223 | 0.229   | -0.270 |
| <i>Tokay</i>                        |        |       |         |        |
| Landscape → Tokay                   | -0.052 | 0.010 | < 0.001 | -0.568 |
| Seasonality → Tokay                 | 0.008  | 0.010 | 0.471   | 0.081  |
| <i>Cats</i>                         |        |       |         |        |
| Landscape → Cats                    | 0.099  | 0.049 | 0.044   | 0.100  |
| <b>Co-variance</b>                  |        |       |         |        |
| Landscape ~ Seasonality             | 0.072  | 0.158 | 0.651   | 0.072  |

**table S3. Parameter estimates (Est.) for all direct and indirect effects in the aquatic structural equation model.** SE is the standard error and Std. Est. is the standardized parameter estimate.

| Effects                                                                        | Alternative model |       |         |           |
|--------------------------------------------------------------------------------|-------------------|-------|---------|-----------|
|                                                                                | Est.              | SE    | P-value | Std. Est. |
| <b>Latent Variables</b>                                                        |                   |       |         |           |
| <i>Seasonality</i>                                                             |                   |       |         |           |
| Precipitation                                                                  | -0.601            | 0.156 | < 0.001 | 0.603     |
| Temperature                                                                    | -0.977            | 0.195 | < 0.001 | -0.980    |
| <i>Landscape</i>                                                               |                   |       |         |           |
| Forest                                                                         | 0.912             | 0.147 | < 0.001 | 0.915     |
| Agriculture                                                                    | -0.783            | 0.120 | < 0.001 | -0.786    |
| Water                                                                          | -0.089            | 0.111 | 0.420   | -0.090    |
| <i>Abiotic factors</i>                                                         |                   |       |         |           |
| EC                                                                             | 0.398             | 0.110 | < 0.001 | 0.460     |
| pH                                                                             | 0.394             | 0.134 | 0.003   | 0.456     |
| Turbidity (ordinal)                                                            | 0.470             | 0.106 | < 0.001 | 0.540     |
| <b>Regressions</b>                                                             |                   |       |         |           |
| <i>Aedes larvae</i> (presence/absence)                                         |                   |       |         |           |
| Abiotic factors                                                                | -0.398            | 0.218 | 0.068   | -0.424    |
| Abiotic factors → Large predators → <i>Aedes larvae</i>                        | -0.054            | 0.081 | 0.505   | -0.058    |
| Abiotic factors → Large predators → Micro-Heteroptera → <i>Aedes larvae</i>    | -0.001            | 0.005 | 0.859   | -0.001    |
| Abiotic factors → Micro-Heteroptera → <i>Aedes larvae</i>                      | -0.016            | 0.042 | 0.707   | -0.017    |
| Total indirect                                                                 | -0.071            | 0.093 | 0.447   | -0.076    |
| Total                                                                          | -0.469            | 0.260 | 0.071   | -0.499    |
| Landscape                                                                      | -0.258            | 0.188 | 0.170   | -0.239    |
| Landscape → Large predators → <i>Aedes larvae</i>                              | -0.146            | 0.058 | 0.012   | -0.135    |
| Landscape → Micro-Heteroptera → <i>Aedes larvae</i>                            | -0.019            | 0.034 | 0.583   | -0.017    |
| Landscape → Large predators → Micro-Heteroptera → <i>Aedes larvae</i>          | -0.002            | 0.013 | 0.858   | -0.002    |
| Landscape → Plants → <i>Aedes larvae</i>                                       | 0.003             | 0.042 | 0.950   | 0.002     |
| Landscape → Plants → Large predators → <i>Aedes larvae</i>                     | 0.002             | 0.032 | 0.949   | 0.002     |
| Landscape → Plants → Large predators → Micro-Heteroptera → <i>Aedes larvae</i> | 0.000             | 0.001 | 0.948   | 0.000     |
| Landscape → Plants → Micro-Heteroptera → <i>Aedes larvae</i>                   | 0.000             | 0.002 | 0.958   | 0.000     |

---

|                                                                                      |        |       |       |        |
|--------------------------------------------------------------------------------------|--------|-------|-------|--------|
| Landscape → Containers → <i>Aedes</i> larvae                                         | 0.011  | 0.013 | 0.390 | 0.010  |
| Landscape → Containers → Large predators → <i>Aedes</i> larvae                       | 0.004  | 0.005 | 0.474 | 0.004  |
| Landscape → Containers → Micro-Heteroptera → <i>Aedes</i> larvae                     | -0.002 | 0.003 | 0.444 | -0.002 |
| Landscape → Containers → Large predators → Micro-Heteroptera → <i>Aedes</i> larvae   | 0.000  | 0.000 | 0.866 | 0.000  |
| Landscape → Abiotic → <i>Aedes</i> larvae                                            | 0.167  | 0.117 | 0.152 | 0.167  |
| Total indirect                                                                       | -0.150 | 0.098 | 0.128 | -0.138 |
| Total                                                                                | -0.408 | 0.173 | 0.018 | -0.377 |
| Seasonality                                                                          | 0.083  | 0.125 | 0.508 | 0.077  |
| Seasonality → Large predators → <i>Aedes</i> larvae                                  | -0.026 | 0.055 | 0.636 | -0.024 |
| Seasonality → Large predators → Micro-Heteroptera → <i>Aedes</i> larvae              | -0.000 | 0.003 | 0.872 | -0.000 |
| Seasonality → Micro-Heteroptera → <i>Aedes</i> larvae                                | -0.016 | 0.031 | 0.612 | -0.016 |
| Seasonality → Abiotic → <i>Aedes</i> larvae                                          | -0.127 | 0.100 | 0.204 | -0.118 |
| Seasonality → Abiotic → Large predators → <i>Aedes</i> larvae                        | -0.017 | 0.028 | 0.538 | -0.016 |
| Seasonality → Abiotic → Large predators → Micro-Heteroptera → <i>Aedes</i> larvae    | -0.000 | 0.002 | 0.859 | -0.000 |
| Seasonality → Abiotic → Micro-Heteroptera → <i>Aedes</i> larvae                      | -0.005 | 0.014 | 0.710 | -0.005 |
| Seasonality → Containers → <i>Aedes</i> larvae                                       | -0.036 | 0.026 | 0.158 | -0.033 |
| Seasonality → Containers → Large predators → <i>Aedes</i> larvae                     | -0.013 | 0.013 | 0.332 | -0.012 |
| Seasonality → Containers → Micro-Heteroptera → <i>Aedes</i> larvae                   | 0.007  | 0.007 | 0.316 | 0.006  |
| Seasonality → Containers → Large predators → Micro-Heteroptera → <i>Aedes</i> larvae | -0.000 | 0.001 | 0.865 | -0.000 |
| Total indirect                                                                       | -0.234 | 0.107 | 0.029 | -0.218 |
| Total                                                                                | -0.151 | 0.127 | 0.232 | -0.141 |
| Containers                                                                           | 0.620  | 0.372 | 0.096 | 0.153  |
| Containers → Large predators → <i>Aedes</i> larvae                                   | 0.218  | 0.210 | 0.299 | 0.054  |
| Containers → Micro-Heteroptera → <i>Aedes</i> larvae                                 | -0.114 | 0.104 | 0.270 | -0.028 |
| Containers → Large predators → Micro-Heteroptera → <i>Aedes</i> larvae               | 0.003  | 0.020 | 0.864 | 0.001  |
| Total indirect                                                                       | 0.107  | 0.228 | 0.638 | 0.026  |
| Total                                                                                | 0.727  | 0.393 | 0.064 | 0.179  |
| Plants                                                                               | -0.262 | 0.304 | 0.389 | -0.243 |
| Plants → Large predators → <i>Aedes</i> larvae                                       | -0.203 | 0.075 | 0.007 | -0.188 |
| Plants → Micro-Heteroptera → <i>Aedes</i> larvae                                     | -0.011 | 0.064 | 0.863 | -0.010 |
| Plants → Large predators → Micro-Heteroptera → <i>Aedes</i> larvae                   | -0.003 | 0.018 | 0.859 | -0.003 |
| Total indirect                                                                       | -0.218 | 0.082 | 0.008 | -0.201 |
| Total                                                                                | -0.480 | 0.291 | 0.099 | -0.444 |
| Large predators                                                                      | -0.444 | 0.197 | 0.024 | -0.405 |
| Large predators → Micro-Heteroptera → <i>Aedes</i> larvae                            | -0.007 | 0.040 | 0.860 | -0.006 |
| Total                                                                                | -0.452 | 0.210 | 0.032 | -0.411 |
| Micro-Heteroptera                                                                    | -0.272 | 0.100 | 0.007 | -0.269 |

---



---

|                        |                                            |        |       |       |        |
|------------------------|--------------------------------------------|--------|-------|-------|--------|
| <i>Large predators</i> |                                            |        |       |       |        |
| Abiotic                |                                            | 0.122  | 0.213 | 0.566 | 0.143  |
| Containers             |                                            | -0.491 | 0.399 | 0.218 | -0.133 |
| Landscape              |                                            | 0.329  | 0.120 | 0.006 | 0.334  |
|                        | Landscape → Plants → Large predators       | -0.005 | 0.073 | 0.949 | -0.005 |
|                        | Landscape → Abiotic → Large predators      | -0.053 | 0.099 | 0.594 | -0.054 |
|                        | Landscape → Containers → Large predators   | -0.009 | 0.011 | 0.448 | -0.009 |
|                        | Total indirect                             | -0.066 | 0.112 | 0.556 | -0.067 |
|                        | Total                                      | 0.263  | 0.090 | 0.003 | 0.267  |
| Plants                 |                                            | 0.458  | 0.167 | 0.006 | 0.465  |
|                        | Plants → Abiotic → Large predators         | -0.018 | 0.071 | 0.800 | -0.018 |
|                        | Total                                      | 0.440  | 0.127 | 0.001 | 0.446  |
| Seasonality            |                                            | 0.058  | 0.112 | 0.658 | 0.045  |
|                        | Seasonality → Abiotic → Large predators    | 0.039  | 0.073 | 0.591 | 0.040  |
|                        | Seasonality → Containers → Large predators | 0.029  | 0.026 | 0.276 | 0.029  |
|                        | Total indirect                             | 0.068  | 0.075 | 0.367 | 0.069  |
|                        | Total                                      | 0.126  | 0.088 | 0.154 | 0.128  |

---

|                          |                                                              |        |       |       |        |
|--------------------------|--------------------------------------------------------------|--------|-------|-------|--------|
| <i>Micro-Heteroptera</i> |                                                              |        |       |       |        |
| Large predators          |                                                              | 0.026  | 0.144 | 0.857 | 0.024  |
| Containers               |                                                              | 0.420  | 0.330 | 0.203 | 0.105  |
|                          | Containers → Large predators → Micro-Heteroptera             | -0.013 | 0.073 | 0.861 | -0.003 |
|                          | Total                                                        | 0.407  | 0.326 | 0.211 | 0.102  |
| Abiotic                  |                                                              | 0.058  | 0.167 | 0.726 | 0.063  |
|                          | Abiotic → Large predators → Micro-Heteroptera                | 0.003  | 0.017 | 0.856 | 0.003  |
|                          | Total                                                        | 0.062  | 0.162 | 0.704 | 0.067  |
| Landscape                |                                                              | 0.068  | 0.135 | 0.614 | 0.064  |
|                          | Landscape → Plants → Micro-Heteroptera                       | -0.000 | 0.008 | 0.959 | -0.000 |
|                          | Landscape → Abiotic → Micro-Heteroptera                      | -0.025 | 0.073 | 0.730 | -0.024 |
|                          | Landscape → Large predators → Micro-Heteroptera              | 0.009  | 0.047 | 0.855 | 0.008  |
|                          | Landscape → Plants → Large predators → Micro-Heteroptera     | -0.000 | 0.002 | 0.948 | -0.000 |
|                          | Landscape → Abiotic → Large predators → Micro-Heteroptera    | -0.001 | 0.008 | 0.856 | -0.001 |
|                          | Landscape → Containers → Micro-Heteroptera                   | 0.007  | 0.009 | 0.425 | 0.007  |
|                          | Landscape → Containers → Large predators → Micro-Heteroptera | -0.000 | 0.001 | 0.863 | -0.000 |
|                          | Total indirect                                               | -0.012 | 0.099 | 0.907 | -0.011 |
|                          | Total                                                        | 0.057  | 0.092 | 0.540 | 0.053  |
| Plants                   |                                                              | 0.040  | 0.242 | 0.867 | 0.038  |
|                          | Plants → Abiotic → Micro-Heteroptera                         | -0.009 | 0.034 | 0.799 | -0.008 |

---

|                                                                |        |       |       |        |
|----------------------------------------------------------------|--------|-------|-------|--------|
| Plants → Large predators → Micro-Heteroptera                   | 0.012  | 0.064 | 0.856 | 0.011  |
| Plants → Abiotic → Large predators → Micro-Heteroptera         | -0.000 | 0.003 | 0.872 | -0.000 |
| Total indirect                                                 | -0.001 | 0.068 | 0.994 | 0.000  |
| Total                                                          | 0.035  | 0.179 | 0.845 | 0.033  |
| Seasonality                                                    | 0.048  | 0.108 | 0.658 | 0.045  |
| Seasonality → Abiotic → Micro-Heteroptera                      | 0.019  | 0.054 | 0.728 | 0.018  |
| Seasonality → Large predators → Micro-Heteroptera              | 0.002  | 0.009 | 0.869 | 0.001  |
| Seasonality → Abiotic → Large predators → Micro-Heteroptera    | 0.001  | 0.006 | 0.856 | 0.001  |
| Seasonality → Containers → Micro-Heteroptera                   | -0.024 | 0.022 | 0.271 | -0.023 |
| Seasonality → Containers → Large predators → Micro-Heteroptera | 0.001  | 0.004 | 0.862 | 0.001  |
| Total indirect                                                 | -0.003 | 0.058 | 0.965 | -0.002 |
| Total                                                          | 0.045  | 0.090 | 0.615 | 0.043  |
| <i>Abiotic factors</i>                                         |        |       |       |        |
| Landscape                                                      | -0.432 | 0.159 | 0.007 | -0.375 |
| Landscape → Plants → Abiotic factors                           | 0.001  | 0.023 | 0.949 | 0.001  |
| Total                                                          | -0.431 | 0.159 | 0.007 | -0.374 |
| Seasonality                                                    | -0.320 | 0.172 | 0.063 | 0.278  |
| Plants                                                         | -0.147 | 0.371 | 0.692 | -0.128 |
| <i>Containers</i>                                              |        |       |       |        |
| Landscape                                                      | 0.017  | 0.016 | 0.288 | 0.065  |
| Seasonality                                                    | -0.058 | 0.023 | 0.010 | -0.219 |
| <i>Plants</i>                                                  |        |       |       |        |
| Landscape                                                      | -0.010 | 0.160 | 0.949 | -0.010 |
| <b>Covariance</b>                                              |        |       |       |        |
| EC ~ pH                                                        | 0.183  | 0.089 | 0.041 | 0.233  |
| Landscape ~ Seasonality                                        | -0.067 | 0.083 | 0.445 | -0.068 |
